# Supplementary material for: Probing Red Blood Cell Membrane Microviscosity Using Fluorescence Anisotropy Decay Curves of the Lipophilic Dye PKH26
Source: MDPI journal article supplement (doi:10.3390/ijms232415767), 2022-12-12
Supplement: s1 [file s1]

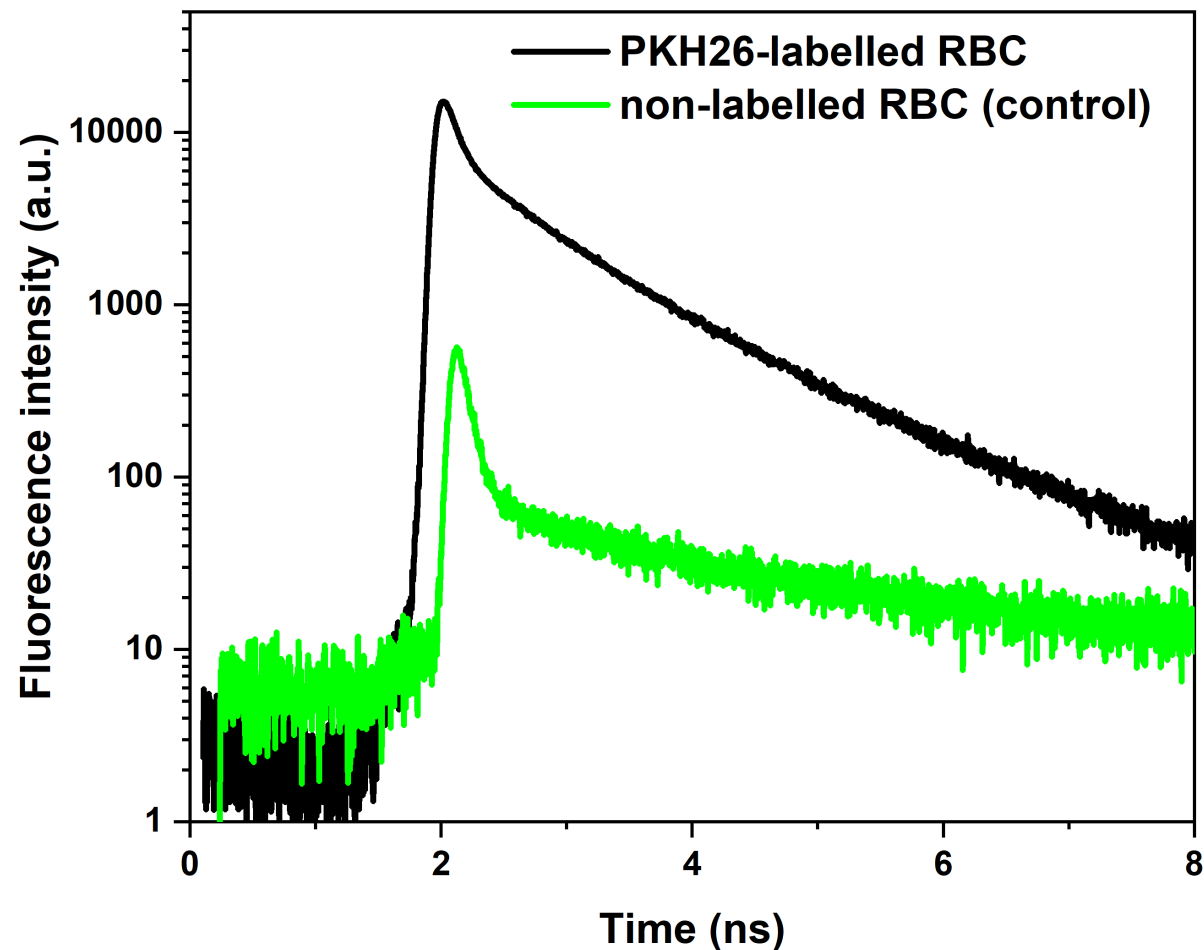

**Supplementary Figure S1.** Fluorescence decay curve of PKH26-labelled ([PKH26] = 20 nM) and non-labelled (control) RBC.  $\lambda_{\text{exc}} = 510 \text{ nm}$ ,  $\lambda_{\text{det}} = 590 \text{ nm}$ . One can see that at 20 nM concentration of PKH26 fluorescence in the sample of the stained RBC sample significantly exceeds the signal of non-labeled intact RBC. This signal originates from the formation of hemoglobin photoproducts which is responsible for two-photon and single photon-excited fluorescence of red blood cells (Shirshin E.A., Yakimov B.P. et al. doi: 10.1088/1612-202X/aac003 ).

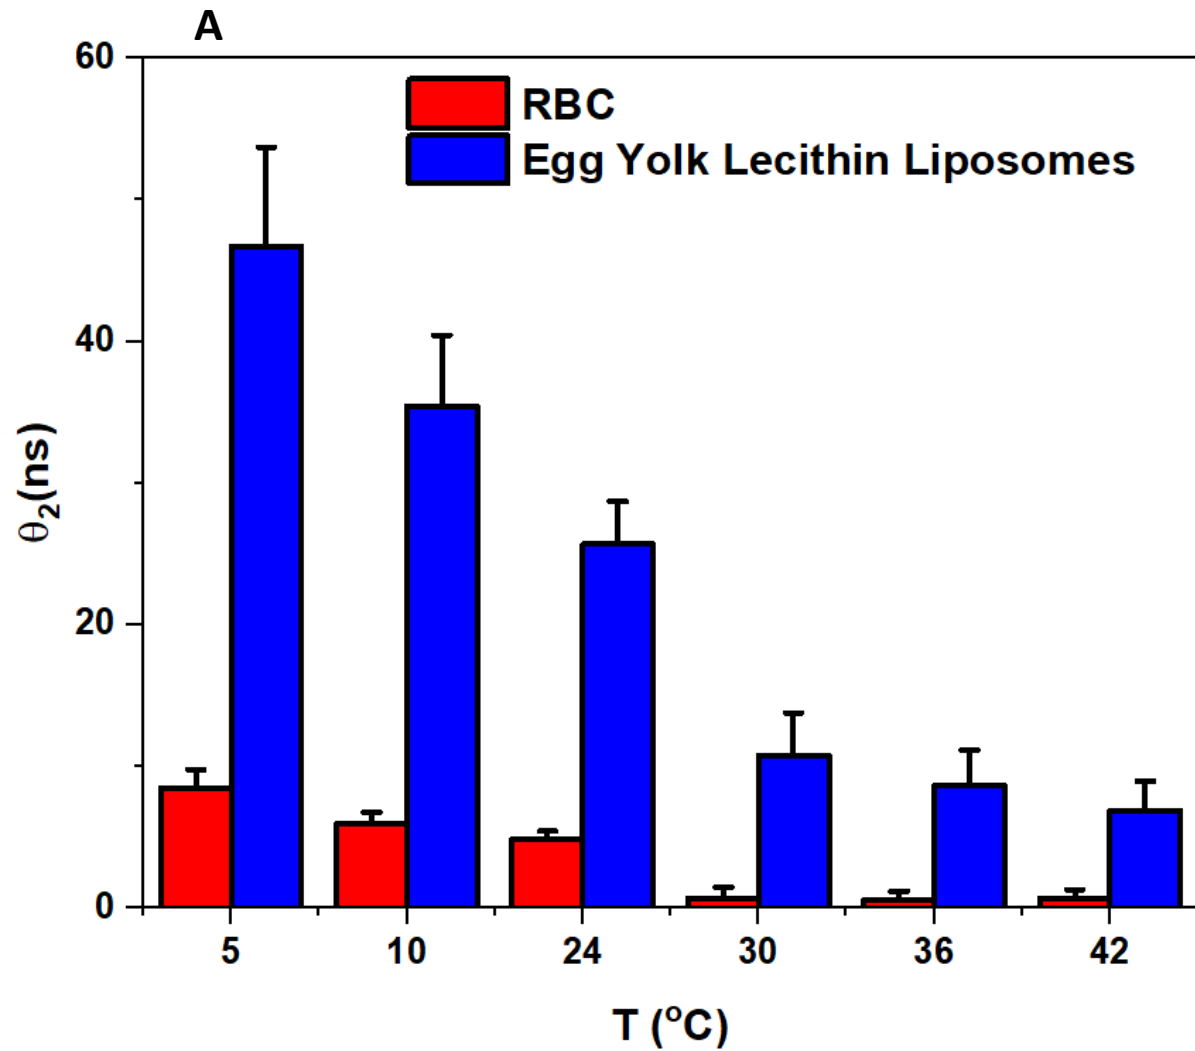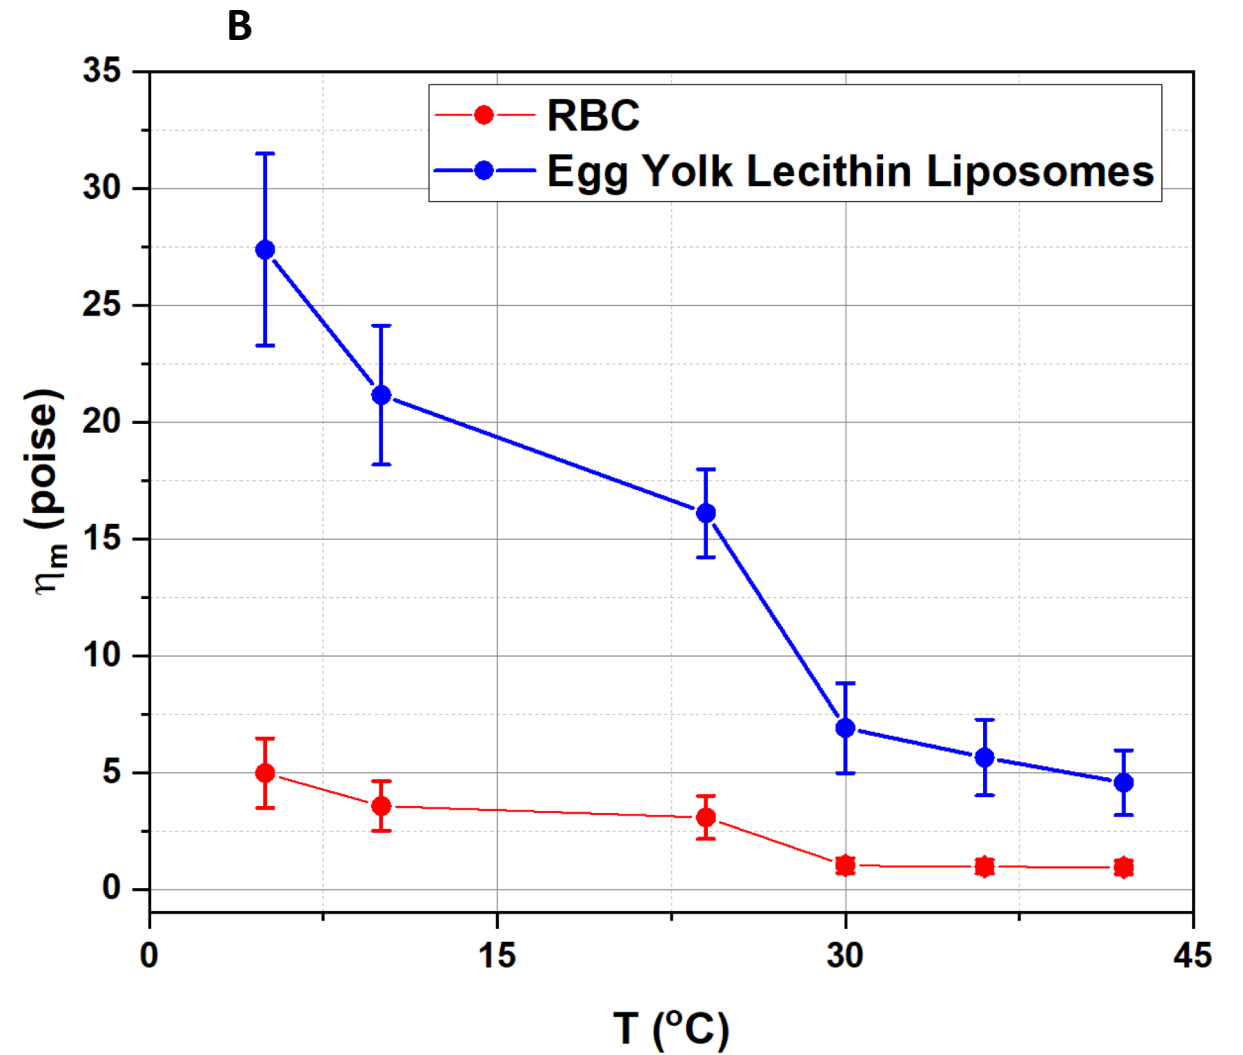

**Supplementary Figure S2.** The dependence of (A) - correlation time  $\theta_2$  of PKH26 fluorescence anisotropy and (B) - the microviscosity  $\eta_m$  of membranes of egg yolk lecithin liposomes and red blood cells obtained from the rotational diffusion of fluorescent probe PKH26, embedded into membrane, basing on its time-resolved fluorescence anisotropy. [PKH26] = 20 nM. Hematocrit 0.1%. Liposomes represent 1%-suspension.

**Supplementary Figure S3.** Physical basis of measuring microviscosity using time-resolved fluorescence anisotropy (step-wise description). (1) the solution is irradiated with polarized light; (2) the occurring fluorescence will include: signal originated from photo-selected chromophores (those, which dipole moment coincides (correlates) with polarization plane) and signal originated from chromophores with another orientation of dipoles due to rotational diffusion in the solution; (3) Detection of polarized emission ( $I_{||}$ ) and non-polarized emission ( $I_{\perp}$ ).

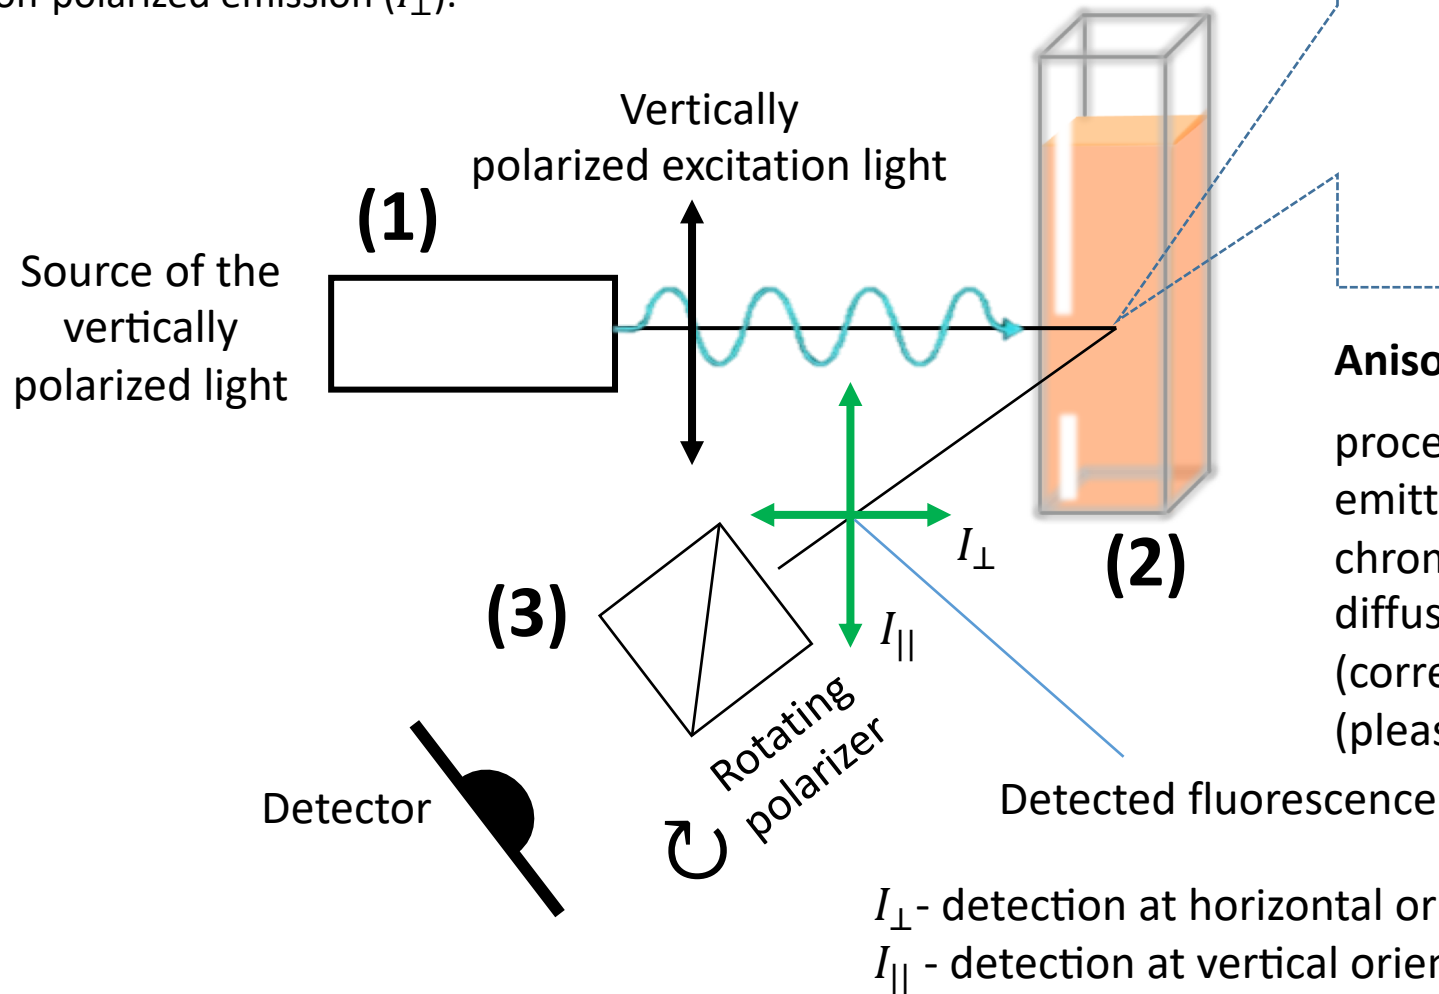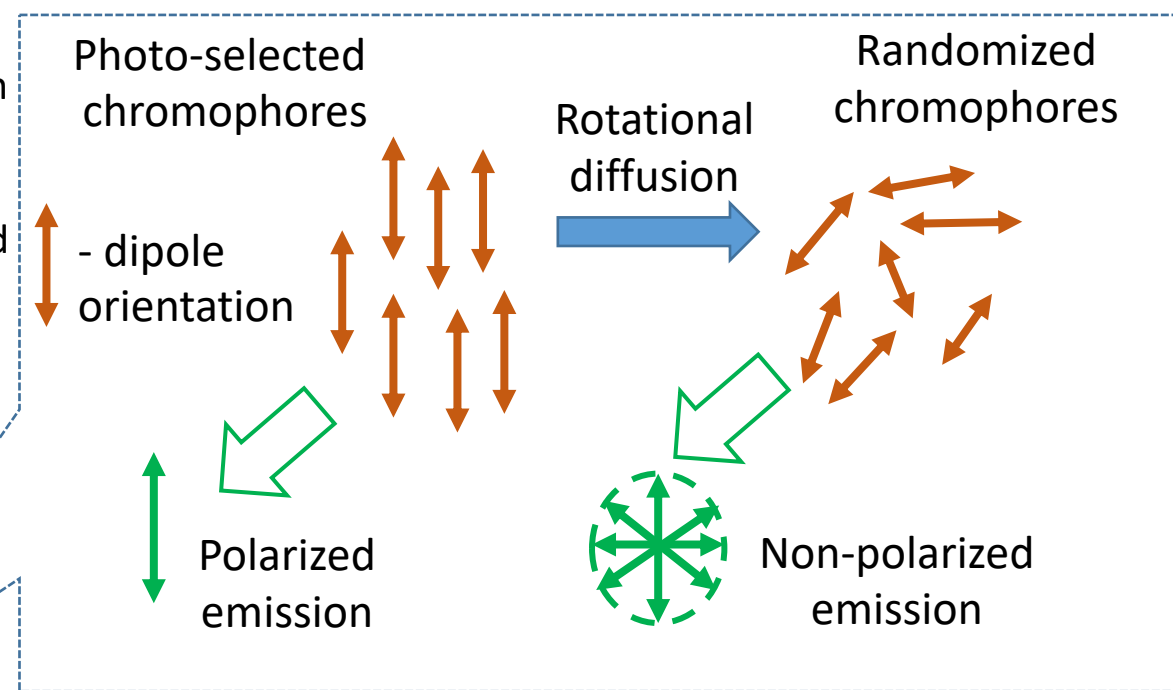

**Anisotropy kinetics**  $r(t) = \frac{I_{||}(t) - GI_{\perp}(t)}{I_{||}(t) + 2GI_{\perp}(t)}$  describes the process of the depolarization (decorrelation) of the emitted fluorescence, i.e. transition of photo-selected chromophores to the randomized state due to rotational diffusion. The characteristic time of this transition (correlation time  $\theta$ ) depends on the microviscosity (please refer to Perrin equation for more details).
